# Supplementary material for: Elucidating the effect of intrinsic defects on the dosimetric properties of the MgB4O7compound: an atomistic simulation approach
Source: Royal Society of Chemistry journal article supplement (doi:10.1039/d1nj06080e), 2022-01-01
Supplement: d1nj06080e1.pdf [file d1nj06080e1.pdf]

## Supporting Information

### Elucidating the role of intrinsic defects on dosimetric properties of the MgB<sub>4</sub>O<sub>7</sub> compound: an atomistic simulation approach

Raíssa Contassot,<sup>a</sup> João Batista,<sup>a</sup> André Otsuka,<sup>b</sup> Antônio Souza,<sup>c</sup> Edward Ferraz,<sup>c</sup>  
Adelmo Souza,<sup>d</sup> Jorge L. O. Santos,<sup>d</sup> Vinicius Coelho<sup>d</sup> and Heveson Lima<sup>e</sup>

<sup>a</sup>Departamento de Ciências Exatas e Sociais Aplicadas, Universidade Federal de  
Ciências da Saúde de Porto Alegre, 40050-170, Porto Alegre, RS, Brazil

<sup>b</sup>Departamento de Física, Universidade Federal de Sergipe, 49100-000, São Cristóvão,  
SE, Brazil

<sup>c</sup>Centro das Ciências Exatas e das Tecnologias, Universidade Federal do Oeste da Bahia,  
47808-021, Barreiras, BA, Brazil

<sup>d</sup>Centro Multidisciplinar de Bom Jesus da Lapa, Universidade Federal do Oeste da  
Bahia, 47600-000, Bom Jesus da Lapa, BA, Brazil

<sup>e</sup>Centro Multidisciplinar de Luís Eduardo Magalhães, Universidade Federal do Oeste da  
Bahia, 47850-000, Luís Eduardo Magalhães, BA, Brazil

#### (A) Oxide precursors (MgO and B<sub>2</sub>O<sub>3</sub>)

**Table S1-** Lattice parameters for MgO.

| Lattice parameters    | Ref. <sup>1</sup> | This work | %    |
|-----------------------|-------------------|-----------|------|
| $a$ (Å)               | 4.217             | 4.275     | 1.37 |
| $V$ (Å <sup>3</sup> ) | 74.991            | 78.107    | 4.15 |

**Table S2-** Elastic constants (in GPa) for MgO.

| Elastic constants | Ref. <sup>2</sup> | This work | %     |
|-------------------|-------------------|-----------|-------|
| $C_{11}$          | 297.00            | 267.91    | -9.80 |
| $C_{12}$          | 95.20             | 118.16    | 24.11 |
| $C_{44}$          | 155.70            | 190.61    | 22.42 |

For MgO, BSM potential was used to remove the Cauchy violation in the elastic constants:  $r_0=0.221$  Å and  $K=134.546$  eVÅ<sup>-2</sup>.

**Table S3-** Dielectric constants for MgO.

| Dielectric constants | Ref. <sup>3</sup> | This work | %     |
|----------------------|-------------------|-----------|-------|
| $\epsilon_0$         | 9.90              | 11.57     | 16.87 |
| $\epsilon_\infty$    | -                 | 3.02      | -     |

**Table S4-** Lattice parameters for trigonal B<sub>2</sub>O<sub>3</sub>.

| Lattice parameters | Ref. <sup>4</sup> | This work | %     |
|--------------------|-------------------|-----------|-------|
| $a(\text{Å})$      | 4.335             | 4.302     | -0.76 |
| $c(\text{Å})$      | 8.341             | 8.245     | -1.16 |
| $V(\text{Å}^3)$    | 135.759           | 132.142   | -2.66 |

**Table S5-** Elastic constants (in GPa) for trigonal B<sub>2</sub>O<sub>3</sub>.

| Elastic Constants | Ref. <sup>5</sup> | This work | %     |
|-------------------|-------------------|-----------|-------|
| $C_{11}$          | 223.4             | 230.930   | 3.37  |
| $C_{12}$          | 58.9              | 70.375    | 19.48 |
| $C_{13}$          | -                 | 11.701    | -     |
| $C_{14}$          | -                 | 10.904    | -     |
| $C_{33}$          | -                 | 72.537    | -     |
| $C_{44}$          | -                 | 47.333    | -     |
| $C_{66}$          | -                 | 80.277    | -     |

We have used the results obtained with the B1 potential of Takada's work <sup>5</sup> for sake of comparison.

There, just  $C_{11}$  and  $C_{12}$  are shown.

**Table S6-** Dielectric constants for trigonal B<sub>2</sub>O<sub>3</sub>.

| Dielectric constants | Ref. <sup>6</sup> | This work | %     |
|----------------------|-------------------|-----------|-------|
| $\epsilon_0$         | 3.98              | 4.86      | 22.11 |
| $\epsilon_\infty$    | -                 | 2.96      | -     |

## (B) Defect calculations

**Table S7-** Lattice energy for orthorhombic  $\text{MgB}_4\text{O}_7$  and oxide precursors.

| Materials                | Lattice energies (eV) |
|--------------------------|-----------------------|
| $\text{MgB}_4\text{O}_7$ | -466.399              |
| MgO                      | -38.785               |
| $\text{B}_2\text{O}_3$   | -209.248              |

**Table S8-** Defect formation energy for isolated defects.

| Defect Energy (eV)    |            |         |         |                 |
|-----------------------|------------|---------|---------|-----------------|
| $V_B'''$              | $V_{Mg}''$ | $V_O''$ | $Mg_B'$ | $B_{Mg}\bullet$ |
| 82.455                | 24.051     | 31.586  | 52.730  | -35.965         |
| Interstitial Position |            | $B_i$   | $Mg_i$  | $O_i$           |
| (4/5,3/5,9/10)        |            | -60.716 | -15.641 | -               |
| (3/10,3/10,1/10)      |            | -       | -15.641 | -               |
| (4/5,3/10,1/3)        |            | -       | -14.804 | -23.314         |
| (1/5,7/10,3/5)        |            | -49.031 | -15.641 | -10.434         |

**Table S9-** Solution energies for intrinsic defects, normalized per defect.

| Defect type                            | Solution energy (eV/def) |
|----------------------------------------|--------------------------|
| Mg Frenkel                             | 4.2048                   |
| B Frenkel                              | 11.3695                  |
| O Frenkel                              | 4.1363                   |
| $\text{MgB}_4\text{O}_7$ Schottky      | 9.3814                   |
| MgO Schottky                           | 8.4262                   |
| $\text{B}_2\text{O}_3$ Schottky        | 10.4842                  |
| $\text{MgB}_4\text{O}_7$ anti-Schottky | 3.7248                   |
| MgO anti-Schottky                      | -0.0851                  |
| $\text{B}_2\text{O}_3$ anti-Schottky   | 3.5749                   |
| $\text{Mg}_B$ antisite                 | 6.0059                   |

## Reference

- 1 S. Sasaki, K. Fujino and Y. Takéuchi, *Proc. Japan Acad. Ser. B*, 1979, **55**, 43–48.
- 2 C.-S. Zha, H.-K. Mao and R. J. Hemley, *Proc. Natl. Acad. Sci.*, 2000, **97**, 13494–13499.
- 3 M. A. Subramanian, R. D. Shannon, B. H. T. Chai, M. M. Abraham and M. C. Wintersgill, *Phys. Chem. Miner.*, 1989, **16**, 741–746.
- 4 M. Burianek, J. Birkenstock, P. Mair, V. Kahlenberg, O. Medenbach, R. D. Shannon and R. X. Fischer, *Phys. Chem. Miner.*, 2016, **43**, 527–534.
- 5 A. Takada, C. R. A. Catlow and G. D. Price, *J. Phys. Condens. Matter*, 1995, **7**, 8659–8692.
- 6 L. Li, W. Bin Hong, X. J. Yan and X. M. Chen, *Int. J. Appl. Ceram. Technol.*, 2019, **16**, 2047–2052.
